# Supplementary material for: Effects of interesterified lipid design on the short/medium chain fatty acid hydrolysis rate and extent (in vitro)
Source: Royal Society of Chemistry journal article supplement (doi:10.1039/c9fo00671k), 2019-01-01
Supplement: c9fo00671k1.pdf [file c9fo00671k1.pdf]

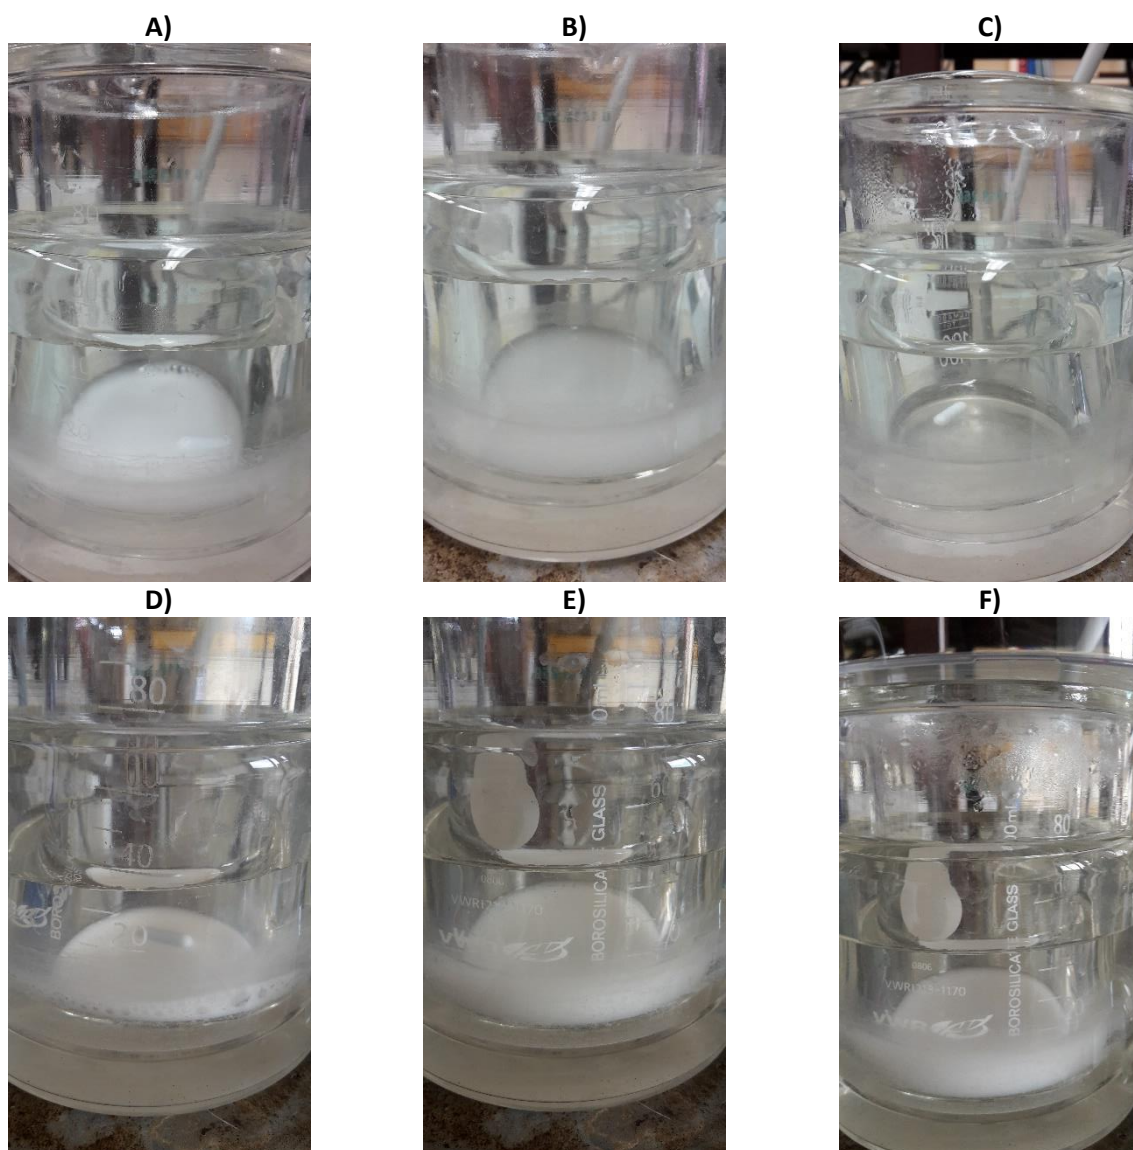

**Supplemental Figure 1:** Visual changes during gastric digestion of tributyrin (A-C) and C4-C18 :1 (D-E). Gastric digestion is occurring in the presence of rabbit gastric lipase, conditions outlined in experimental procedures. Time points are 0min, 5 minutes, and 90 minutes of gastric digestion. It is apparent that the tributyrin digesta is completely transparent after 90 minutes of gastric digestion.
